# Supplementary material
Source: MDPI journal article supplement (https://www.mdpi.com/2073-4395/13/5/1300)
Supplement: s1 [file s1]

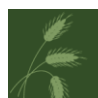

**Table S1:** Tomato homologs of selected tobamoviral S-genes from literature. Genes in bold are discussed in the text.

| Gene                                 | Reference          | Plant species identified                                                         | Gene ID                                          | Candidate tomato homolog                                                               |
|--------------------------------------|--------------------|----------------------------------------------------------------------------------|--------------------------------------------------|----------------------------------------------------------------------------------------|
| ACS6                                 | [128]              | <i>Arabidopsis</i>                                                               | AT4G11280                                        | Solyc08g081535<br>Solyc01g095080                                                       |
| <b>ANK</b>                           | [86]               | <i>Nicotiana tabacum</i><br>cv. Turk                                             | GU320195.1                                       | Solyc01g104170<br>Solyc10g024330                                                       |
| <b>ARL8a/b/c</b>                     | [53]               | <i>Arabidopsis</i>                                                               | AT3G49870<br>AT5G67560<br>AT5G37680              | Solyc02g064640<br>Solyc02g092330<br>Solyc03g043960<br>Solyc11g011040                   |
| <b>BAM1/2</b>                        | [89]               | <i>Arabidopsis</i>                                                               | AT5G65700                                        | Solyc02g091840                                                                         |
| CCT8                                 | [129]              | <i>Arabidopsis</i>                                                               | AT3G03960                                        | Solyc01g088080                                                                         |
| cPGK                                 | [130]<br>[131,132] | <i>Nicotiana</i> spp.,<br><i>Solanum</i> spp,<br>monocots                        | AT1G56190                                        | Solyc07g066610<br>Solyc07g066600                                                       |
| CPR5                                 | [133]              | <i>O. glaberrima</i> ,<br><i>Arabidopsis</i>                                     | AT5G64930                                        | Solyc04g054170                                                                         |
| DBP1                                 | [134]              | <i>Arabidopsis</i> ,<br><i>N. tabacum</i> ,<br><i>Z. mays</i> , <i>O. sativa</i> | AT2G25620                                        | Solyc06g065610                                                                         |
| eEF1B                                | [135]              | <i>Arabidopsis</i>                                                               | AT5G12110                                        | Solyc11g072190<br>Solyc07g016150                                                       |
| ERF104                               | [128]              | <i>Arabidopsis</i>                                                               | OAO93097.1                                       | Solyc03g093550                                                                         |
| EXA1, SNC1-<br>ENHANCING 11          | [136]<br>[137]     | <i>Arabidopsis</i> ,<br><i>O. sativa</i> ,<br><i>S. lycopersicum</i>             | AT5G42950                                        | Solyc04g080240                                                                         |
| GCD10                                | [138]              | yeast, <i>Arabidopsis</i>                                                        | AT2G45730                                        | Solyc04g081360                                                                         |
| GDI2                                 | [139]              | <i>Arabidopsis</i>                                                               | AT3G59920                                        | Solyc12g017570<br>Solyc08g015860<br>Solyc01g105810                                     |
| GMP1                                 | [140]              | <i>Arabidopsis</i> ,<br><i>N. benthamiana</i>                                    | AT2G39770                                        | Solyc03g096730<br>Solyc06g051270<br>Solyc09g011220                                     |
| HAT1;<br>HAT2;<br>HAT3, TF<br>HSP101 | [141]<br>[142,143] | <i>Arabidopsis</i><br><br><i>Arabidopsis</i>                                     | AT4G17460<br>AT5G47370<br>AT3G60390<br>AT1G74310 | Solyc06g060830<br>Solyc08g007270<br>Solyc08g078300<br>Solyc03g115230<br>Solyc06g082560 |

|                                          |                |                                                                                                 |                         |                                                                      |
|------------------------------------------|----------------|-------------------------------------------------------------------------------------------------|-------------------------|----------------------------------------------------------------------|
| HSP70                                    | [144]          | <i>Arabidopsis</i>                                                                              | AT5G02500               | Solyc09g010630<br>Solyc11g066060<br>Solyc06g076020                   |
| <b>IP-L</b>                              | [90]           | <i>N. benthamiana</i>                                                                           |                         | Solyc05g013630                                                       |
| IRE1a,<br>IRE1b                          | [145]          | <i>Arabidopsis</i>                                                                              | AT2G17520<br>AT5G24360  | Solyc02g082470<br>Solyc04g082620                                     |
| KELP                                     | [146]          | <i>Arabidopsis</i>                                                                              | AT4G10920               | Solyc08g082580                                                       |
| <b>LET12</b>                             | [97]           | <i>N. tabacum</i>                                                                               | LOC107784320            | Solyc07g007120<br>Solyc08g041820<br>Solyc12g010410                   |
| NtNACCP1,<br>aldose 1-<br>epimerase-like | [147]          | <i>N. tabacum</i> ,<br><i>Arabidopsis</i>                                                       | AF307094<br>AT5G14630   | Solyc02g087780<br>Solyc02g087800<br>Solyc02g087790<br>Solyc02g087770 |
| P58 <sup>IPK</sup>                       | [148]          | <i>Arabidopsis</i>                                                                              | AT5G03160               | Solyc09g007630                                                       |
| <b>PAP85</b> /<br>vilicin                | [64]           | <i>Arabidopsis</i>                                                                              | AT3G22640               | Solyc09g082340<br>Solyc09g082330<br>Solyc09g065470                   |
| PCaP1                                    | [149]          | <i>Arabidopsis</i>                                                                              | AT4G20260               | Solyc10g005100                                                       |
| PDIL5-1                                  | [150]          | Barley, all plant<br>species                                                                    | AMX74274.1<br>AT1G07690 | Solyc11g069690                                                       |
| PDLP1,<br>PDLP1A                         | [151]          | <i>Arabidopsis</i>                                                                              | AT5G43980               | Solyc06g083750<br>Solyc03g005690<br>Solyc09g090680                   |
| <b>PME</b>                               | [99]           | <i>N. tabacum</i> ,<br><i>Arabidopsis</i>                                                       | AT1G53840               | Solyc03g123630                                                       |
| PVIP1;<br>PVIP2                          | [152]<br>[153] | <i>P. vulgaris</i> , <i>Ara-<br/>bidopsis</i> ,<br><i>P. sativum</i> ,<br><i>N. benthamiana</i> | ACQ59191.1              | Solyc07g047780<br>Solyc05g054180                                     |
| RHD3                                     | [154]          | <i>Arabidopsis</i>                                                                              | AT3G13870               | Solyc03g121590<br>Solyc02g030450                                     |
| RIM1                                     | [155]          | <i>O. sativa</i> ,<br><i>Arabidopsis</i>                                                        | Os03G02800<br>AT1G65910 | Solyc02g036430<br>Solyc02g081270                                     |
| SCE1                                     | [156]          | <i>Arabidopsis</i>                                                                              | AT3G57870               | Solyc03g044260<br>Solyc02g093110<br>Solyc12g088680<br>Solyc04g078620 |
| <b>SYP22/SYP23</b>                       | [67]           | <i>Arabidopsis</i>                                                                              | AT5G46860               | Solyc11g066910<br>Solyc06g062360<br>Solyc08g076540<br>Solyc08g005200 |

|               |                 |                                                                                                                               |                        |                                                                      |
|---------------|-----------------|-------------------------------------------------------------------------------------------------------------------------------|------------------------|----------------------------------------------------------------------|
| <b>SYTA</b>   | [103,104]       | <i>Arabidopsis</i>                                                                                                            | AT2G20990              | Solyc01g111520<br>Solyc12g089330                                     |
| <b>TOM1/3</b> | [73-76,<br>108] | <i>Arabidopsis</i> , <i>Nico-</i><br><i>tiana</i> spp.,<br><i>S. lycopersicum</i> ,<br><i>C. annuum</i> ,<br><i>O. sativa</i> | AT4G21790<br>AT2G02180 | Solyc01g105270<br>Solyc02g080370<br>Solyc04g008540<br>Solyc01g007900 |
| <b>TOM2a</b>  | [79, 157]       | <i>Arabidopsis</i>                                                                                                            | AT1G32400              | Solyc08g077220                                                       |
| <b>TOR1</b>   | [158]           | <i>Arabidopsis</i>                                                                                                            | AT4G27060              | Solyc10g006350                                                       |
| <b>bZIP60</b> | [159,160]       | <i>Arabidopsis</i>                                                                                                            | AT1G42990              | Solyc04g082890                                                       |
